# Supplementary material for: Metal–organic framework coated paper substrates for paper spray mass spectrometry
Source: Royal Society of Chemistry journal article supplement (doi:10.1039/c6ay02123a), 2016-01-01
Supplement: c6ay02123a1.pdf [file c6ay02123a1.pdf]

## Supporting Information

### **Metal-Organic Frameworks Coated Paper Substrates for Paper Spray Mass Spectrometry**

Xiaoting Wang,<sup>‡,a</sup> Yajun Zheng,<sup>‡,a</sup> Teng Wang,<sup>a</sup> Xingchuang Xiong,<sup>b</sup> Xiang Fang,<sup>b</sup>  
Zhiping Zhang<sup>\*,a</sup>

<sup>a</sup> School of Chemistry and Chemical Engineering, Xi'an Shiyou University, Xi'an 710065 (China)

<sup>b</sup> National Institute of Metrology, Beijing 100013 (China)

\* To whom correspondence should be addressed.

Fax: (+86) 29-8838-2693

E-mail: zhangzp0304@gmail.com (Z. Zhang)

[<sup>‡</sup>] These authors contributed equally to this work.

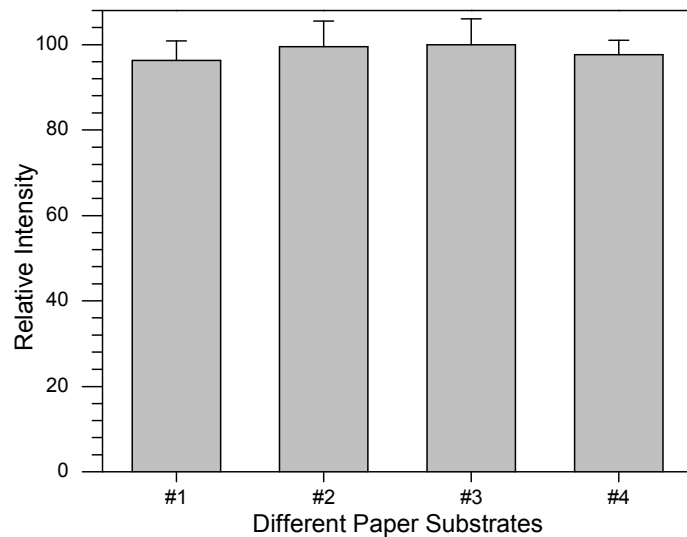

**Figure S1.** Repeatability of the prepared UiO-66(Zr) coated paper substrates (*Note:* The coated amount of UiO-66(Zr) particles was 0.6 g, and the solution volume for coating was 100 mL with 0.1 g soluble starch; 2  $\mu$ L blood sample was used, and the product ions m/z 165 from verapamil was employed for evaluating the performance of the prepared paper substrate; spray solvent, 25  $\mu$ L acetonitrile; applied voltage, 3.5 kV).

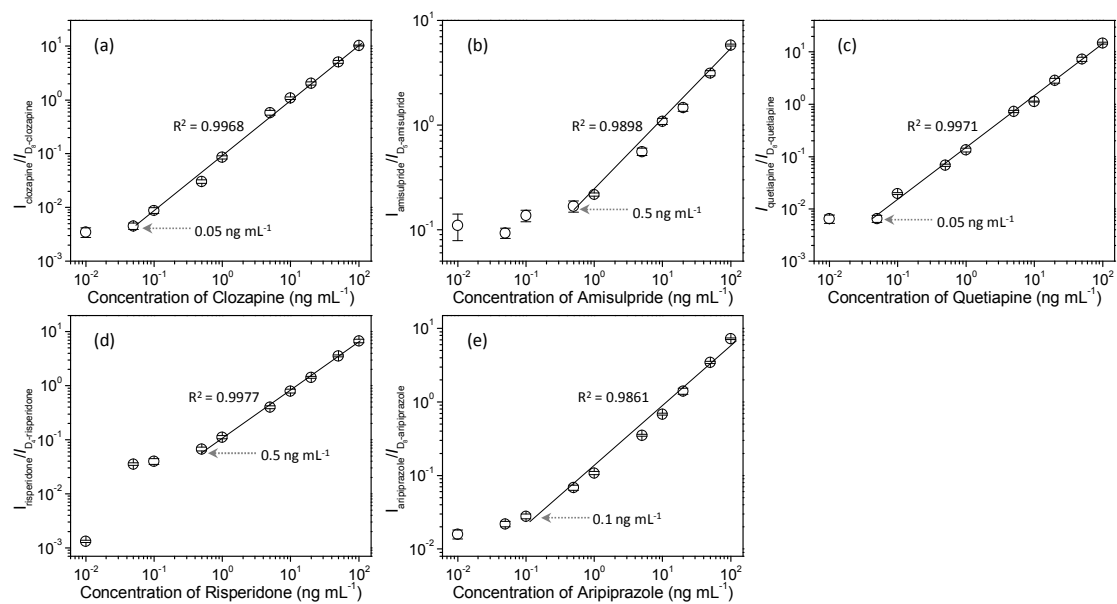

**Figure S2.** Comparison of the quantitative analysis of dried blood spots (human blood samples) spiked with (a) clozapine (0.01 – 100 ng mL<sup>-1</sup>) and its isotopomer D<sub>8</sub>-clozapine (20 ng mL<sup>-1</sup>), (b) amisulpride (0.01 – 100 ng mL<sup>-1</sup>) and its isotopomer D<sub>5</sub>-amisulpride (20 ng mL<sup>-1</sup>), (c) quetiapine (0.01 – 100 ng mL<sup>-1</sup>) and its isotopomer D<sub>8</sub>-quetiapine (20 ng mL<sup>-1</sup>), (d) risperidone (0.01 – 100 ng mL<sup>-1</sup>) and its isotopomer D<sub>4</sub>-risperidone (20 ng mL<sup>-1</sup>), and (e) aripiprazole (0.01 – 100 ng mL<sup>-1</sup>) and its isotopomer D<sub>8</sub>-aripiprazole (20 ng mL<sup>-1</sup>) using UiO-66(Zr) coated paper for paper spray (Note: 2 μL blood sample was used; spray solvent, 25 μL acetonitrile; applied voltage, 3.5 kV).

**Table S1.** Concentrations of different anti-psychotic drugs (ng mL<sup>-1</sup>) in human blood samples by using UiO-66(Zr) coated paper for PSMS

| Number | Clozapine | Amisulpride | Quetiapine | Risperidone | Aripiprazole |
|--------|-----------|-------------|------------|-------------|--------------|
| #1     | 1.11      | n.d.        | 0.35       | n.d.        | 2.48         |
| #2     | 0.26      | n.d.        | 21.62      | n.d.        | 2.85         |
| #3     | 0.22      | 0.69        | 0.18       | 13.30       | 2.21         |
| #4     | 0.22      | 0.67        | 0.20       | 0.87        | 150.30       |
| #5     | 0.30      | n.d.        | 0.12       | n.d.        | 269.19       |
| #6     | 9.15      | 0.88        | 0.50       | 1.89        | 2.78         |
| #7     | 0.26      | n.d.        | 0.45       | n.d.        | 0.21         |
| #8     | 484.67    | n.d.        | 0.32       | 0.75        | 179.95       |
| #9     | 0.32      | 0.68        | 0.46       | 1.48        | 0.58         |
| #10    | 1.70      | 0.94        | 64.82      | 1.73        | 0.77         |
| #11    | 1.45      | n.d.        | 0.16       | n.d.        | 0.20         |
| #12    | 0.23      | n.d.        | 347.17     | n.d.        | 0.45         |
| #13    | 2.65      | n.d.        | 0.28       | n.d.        | 332.55       |
| #14    | 0.12      | n.d.        | 53.76      | n.d.        | 1.52         |
| #15    | 0.07      | 859.25      | 0.31       | n.d.        | 0.35         |
| #16    | 0.05      | 359.29      | 1.08       | n.d.        | 6.34         |
| #17    | 0.08      | 808.51      | 0.60       | n.d.        | 0.52         |
| #18    | n.d.      | 5.17        | 0.05       | n.d.        | 0.12         |
| #19    | 47.35     | 6.28        | 1.13       | 0.57        | 0.71         |
| #20    | 0.15      | 0.66        | 0.26       | n.d.        | 0.44         |
| #21    | 0.86      | n.d.        | 0.34       | 0.50        | 0.37         |
| #22    | 3.33      | 0.99        | 0.05       | n.d.        | 38.19        |
| #23    | 0.14      | n.d.        | 1.79       | 1.34        | 1.04         |
| #24    | 256.98    | n.d.        | 42.29      | 0.86        | 0.88         |
| #25    | 0.15      | n.d.        | 0.58       | 1.12        | 258.17       |
| #26    | 0.05      | n.d.        | 0.10       | n.d.        | 0.65         |
| #27    | 0.49      | n.d.        | 0.71       | 1.04        | 1.59         |
| #28    | 0.48      | n.d.        | 0.63       | 0.69        | 1.13         |
| #29    | 0.26      | n.d.        | 0.20       | 0.55        | 0.48         |
| #30    | 9.65      | n.d.        | 26.38      | n.d.        | 0.63         |
| #31    | 1.31      | n.d.        | 0.20       | n.d.        | n.d.         |
| #32    | 0.52      | n.d.        | 0.18       | n.d.        | 0.39         |
| #33    | 0.08      | n.d.        | 0.09       | n.d.        | 0.19         |
| #34    | 0.84      | n.d.        | 0.09       | n.d.        | 0.43         |
| #35    | 0.11      | n.d.        | 0.09       | n.d.        | 0.32         |
| #36    | 0.36      | n.d.        | 0.18       | n.d.        | 0.31         |
| #37    | 0.10      | n.d.        | 99.57      | n.d.        | 0.42         |
| #38    | 0.12      | n.d.        | 23.19      | n.d.        | 144.51       |
| #39    | n.d.      | n.d.        | 0.22       | 2.28        | 0.71         |
| #40    | 1.35      | 0.66        | 1.26       | 1.12        | 267.86       |

Note:  $n = 4$  per concentration point; The RSD value was a little higher (0.4 - 28.4%) at a lower concentration range (below than 0.1 ng mL<sup>-1</sup>), and when the concentrations of tested drugs were higher than 0.5 ng mL<sup>-1</sup>, its value was in the range of 2.2 – 13.4%; and n.d. stands for not detected.
